# Supplementary material for: Antiretroviral resistance, genotypic characterization and origin of Human Immunodeficiency Virus among the infected wives of Intravenous drug users in Manipur
Source: PubMed Central journal article supplement (PMC6185977; doi:10.1038/s41598-018-33636-z), 2018-10-12
Supplement: 41598_2018_33636_MOESM1_ESM.pdf [file 41598_2018_33636_MOESM1_ESM.pdf]

# Supplementary Information

**Antiretroviral resistance, genotypic characterization and origin of Human Immunodeficiency**

**Virus among the infected wives of Intravenous drug users in Manipur**

Adhikarimayum Lakhikumar Sharma<sup>1</sup>, Thiyam Ramsing Singh<sup>1</sup> and Lisam Shanjukumar Singh<sup>1\*</sup>

<sup>1</sup>Cancer and Molecular Biology Division, Department of Biotechnology, Manipur University,

Canchipur- 795003, Manipur, India

## Corresponding Author

Correspondence to Lisam Shanjukumar Singh, Department of Biotechnology, Manipur University, Canchipur-795003, Manipur, India, Tel: +91 9615533300; fax: +91 385 2435145; e-mail: shanju.lisam@manipuruniv.ac.in.

## Table of Content

| <b>Supplementary</b> | <b>Details</b>                                                                    | <b>Page no.</b> |
|----------------------|-----------------------------------------------------------------------------------|-----------------|
| <b>Table S1</b>      | Additional sample details                                                         | 2-3             |
| <b>Figure S1</b>     | jpHMM results of sequences with TDRMs                                             | 4               |
| <b>Figure S2</b>     | Bootscan analysis                                                                 | 5               |
| <b>Figure S3</b>     | ML phylogenetic tree analysis of HIV-1 sequences without drug resistance mutation | 6               |

**Table S1.** Additional sample details

| <b>Sample ID</b> | <b>Education</b> | <b>Employment</b> | <b>ART status</b> | <b>HIV Diagnose year</b> |
|------------------|------------------|-------------------|-------------------|--------------------------|
| Manipur001       | Graduate         | Private           | Naïve             | 2015                     |
| Manipur002       | Graduate         | Private           | Exposed           | 2015                     |
| Manipur003       | Under 10         | Private           | Exposed           | 2016                     |
| Manipur004       | Under10          | Unemployment      | Exposed           | 2016                     |
| Manipur005       | Graduate         | Private           | Naïve             | 2015                     |
| Manipur006       | Graduate         | Unemployment      | Exposed           | 2015                     |
| Manipur007       | Graduate         | Unemployment      | Exposed           | 2014                     |
| Manipur008       | Graduate         | Unemployment      | Exposed           | 2015                     |
| Manipur009       | Graduate         | Govt. Employee    | Exposed           | 2014                     |
| Manipur010       | Graduate         | Unemployment      | Exposed           | 2016                     |
| Manipur011       | Under 10         | Govt. Employee    | Naïve             | 2016                     |
| Manipur012       | Graduate         | Unemployment      | Exposed           | 2014                     |
| Manipur013       | Graduate         | Unemployment      | Exposed           | 2014                     |
| Manipur014       | Under 10         | Unemployment      | Exposed           | 2015                     |
| Manipur015       | Graduate         | Unemployment      | Exposed           | 2015                     |
| Manipur016       | Graduate         | Private           | Exposed           | 2015                     |
| Manipur017       | Under 10         | Private           | Naïve             | 2015                     |
| Manipur018       | Graduate         | Private           | Exposed           | 2016                     |
| Manipur019       | Graduate         | Unemployment      | Exposed           | 2016                     |
| Manipur020       | Under 10         | Unemployment      | Naïve             | 2015                     |
| Manipur021       | Graduate         | Unemployment      | Naïve             | 2016                     |
| Manipur022       | Under 10         | Student           | Exposed           | 2016                     |
| Manipur023       | Under 10         | Unemployment      | Exposed           | 2014                     |
| Manipur024       | Graduate         | Unemployment      | Exposed           | 2015                     |
| Manipur025       | Under 10         | Unemployment      | Exposed           | 2015                     |
| Manipur026       | Under 10         | Unemployment      | Exposed           | 2014                     |
| Manipur027       | Graduate         | Unemployment      | Exposed           | 2015                     |
| Manipur028       | Graduate         | Unemployment      | Naïve             | 2016                     |
| Manipur029       | Graduate         | Unemployment      | Naïve             | 2015                     |
| Manipur030       | Graduate         | Unemployment      | Naïve             | 2016                     |
| Manipur031       | Graduate         | Unemployment      | Naïve             | 2015                     |
| Manipur032       | Graduate         | Unemployment      | Exposed           | 2016                     |
| Manipur033       | Under 10         | Govt. Employee    | Exposed           | 2014                     |
| Manipur034       | Graduate         | Unemployment      | Naïve             | 2016                     |
| Manipur035       | Graduate         | Unemployment      | Naïve             | 2015                     |
| Manipur036       | Graduate         | Unemployment      | Exposed           | 2015                     |
| Manipur037       | Graduate         | Govt. Employee    | Naïve             | 2016                     |
| Manipur038       | Under 10         | Unemployment      | Naïve             | 2015                     |
| Manipur039       | Under 10         | Govt. Employee    | Naïve             | 2016                     |
| Manipur040       | Under 10         | Unemployment      | Exposed           | 2014                     |
| Manipur041       | Under 10         | Unemployment      | Naïve             | 2016                     |
| Manipur042       | Graduate         | Unemployment      | Exposed           | 2014                     |

|            |          |              |         |      |
|------------|----------|--------------|---------|------|
| Manipur043 | Under 10 | Unemployment | Exposed | 2016 |
| Manipur044 | Graduate | Unemployment | Exposed | 2015 |
| Manipur045 | Graduate | Private      | Exposed | 2016 |
| Manipur046 | Graduate | Private      | Exposed | 2016 |
| Manipur047 | Graduate | Unemployment | Exposed | 2015 |
| Manipur048 | Graduate | Private      | Exposed | 2016 |
| Manipur049 | Graduate | Unemployment | Exposed | 2016 |
| Manipur050 | Graduate | Unemployment | Naïve   | 2015 |
| Manipur051 | Under 10 | Unemployment | Exposed | 2014 |
| Manipur052 | Graduate | Unemployment | Exposed | 2016 |
| Manipur053 | Under 10 | Unemployment | Exposed | 2015 |
| Manipur054 | Under 10 | Unemployment | Exposed | 2015 |
| Manipur055 | Under 10 | Unemployment | Exposed | 2015 |
| Manipur056 | Under 10 | Unemployment | Naïve   | 2016 |

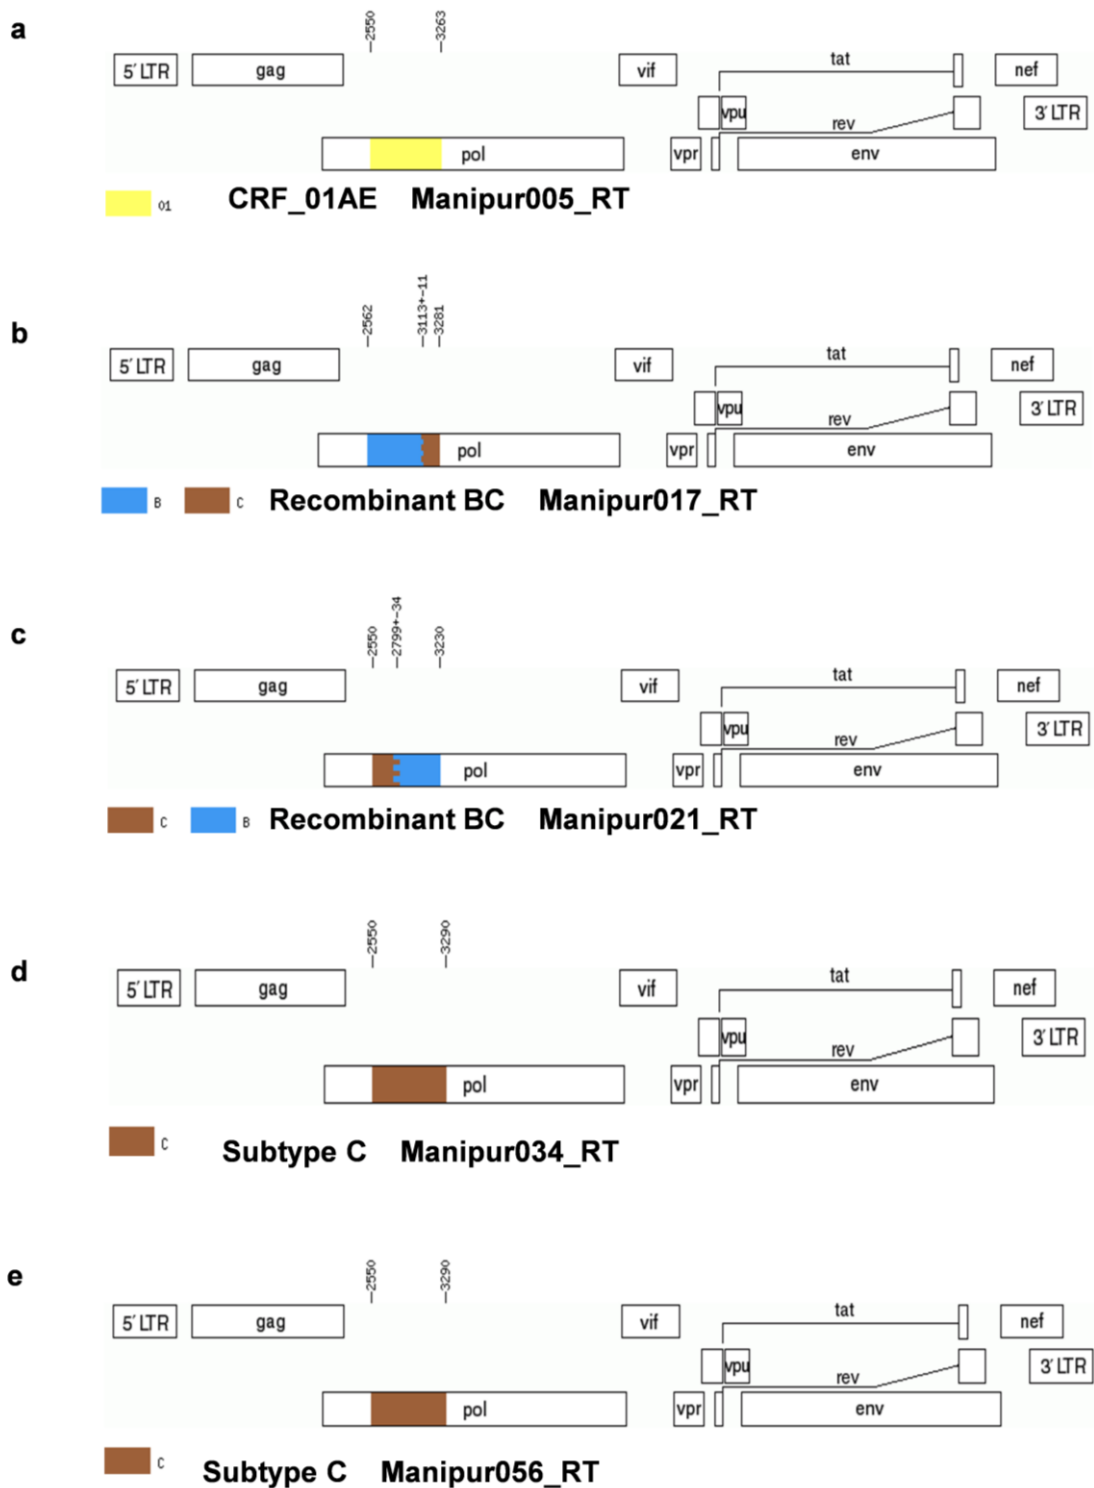

**Figure S1.** Putative TDRM sequences were submitted to the online implementation of jpHMM at the GOBICS server to determine subtype classifications, breakpoint locations and 95% confidence intervals. Breakpoint locations and confidence intervals are marked on each plot and are equivalent to HXB2 numbering. Manipur005\_RT (a); Manipur017\_RT (b); Manipur021\_RT (c); Manipur034\_RT (d) and Manipur056\_RT (e).

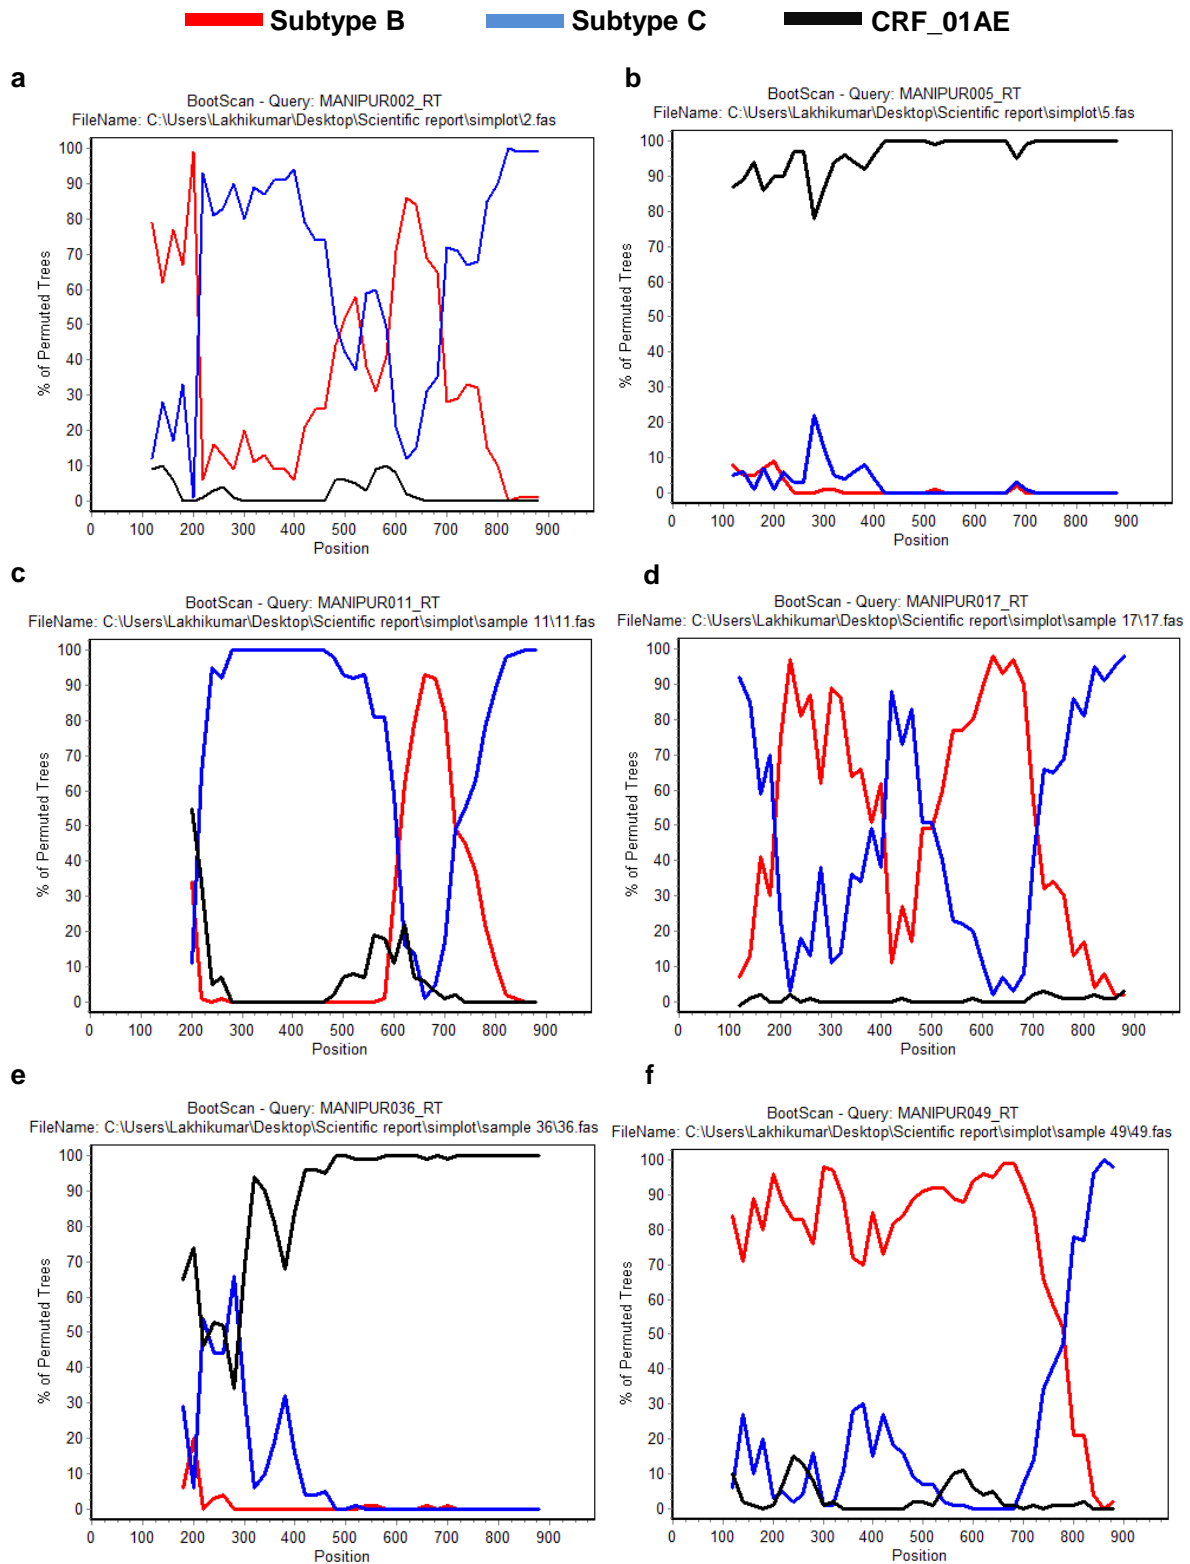

**Figure S2.** Bootscan illustrations from 6 representatives HIV-1 samples; Manipur002\_RT (a), Manipur005\_RT (b), Manipur011\_RT (c), Manipur017\_RT (d), Manipur036\_RT (e) and Manipur049\_RT (f) queried against Subtype B, Subtype C and CRF\_01AE. Bootscan analysis was performed using SimPlot 3.5.1 software configured with 100 bootstrap replicates, a 200 bp window, and a step size of 20 bp. The x-axis shows all aligned nucleotide of the sequence analyzed. The y-axis shows the bootstrap value.

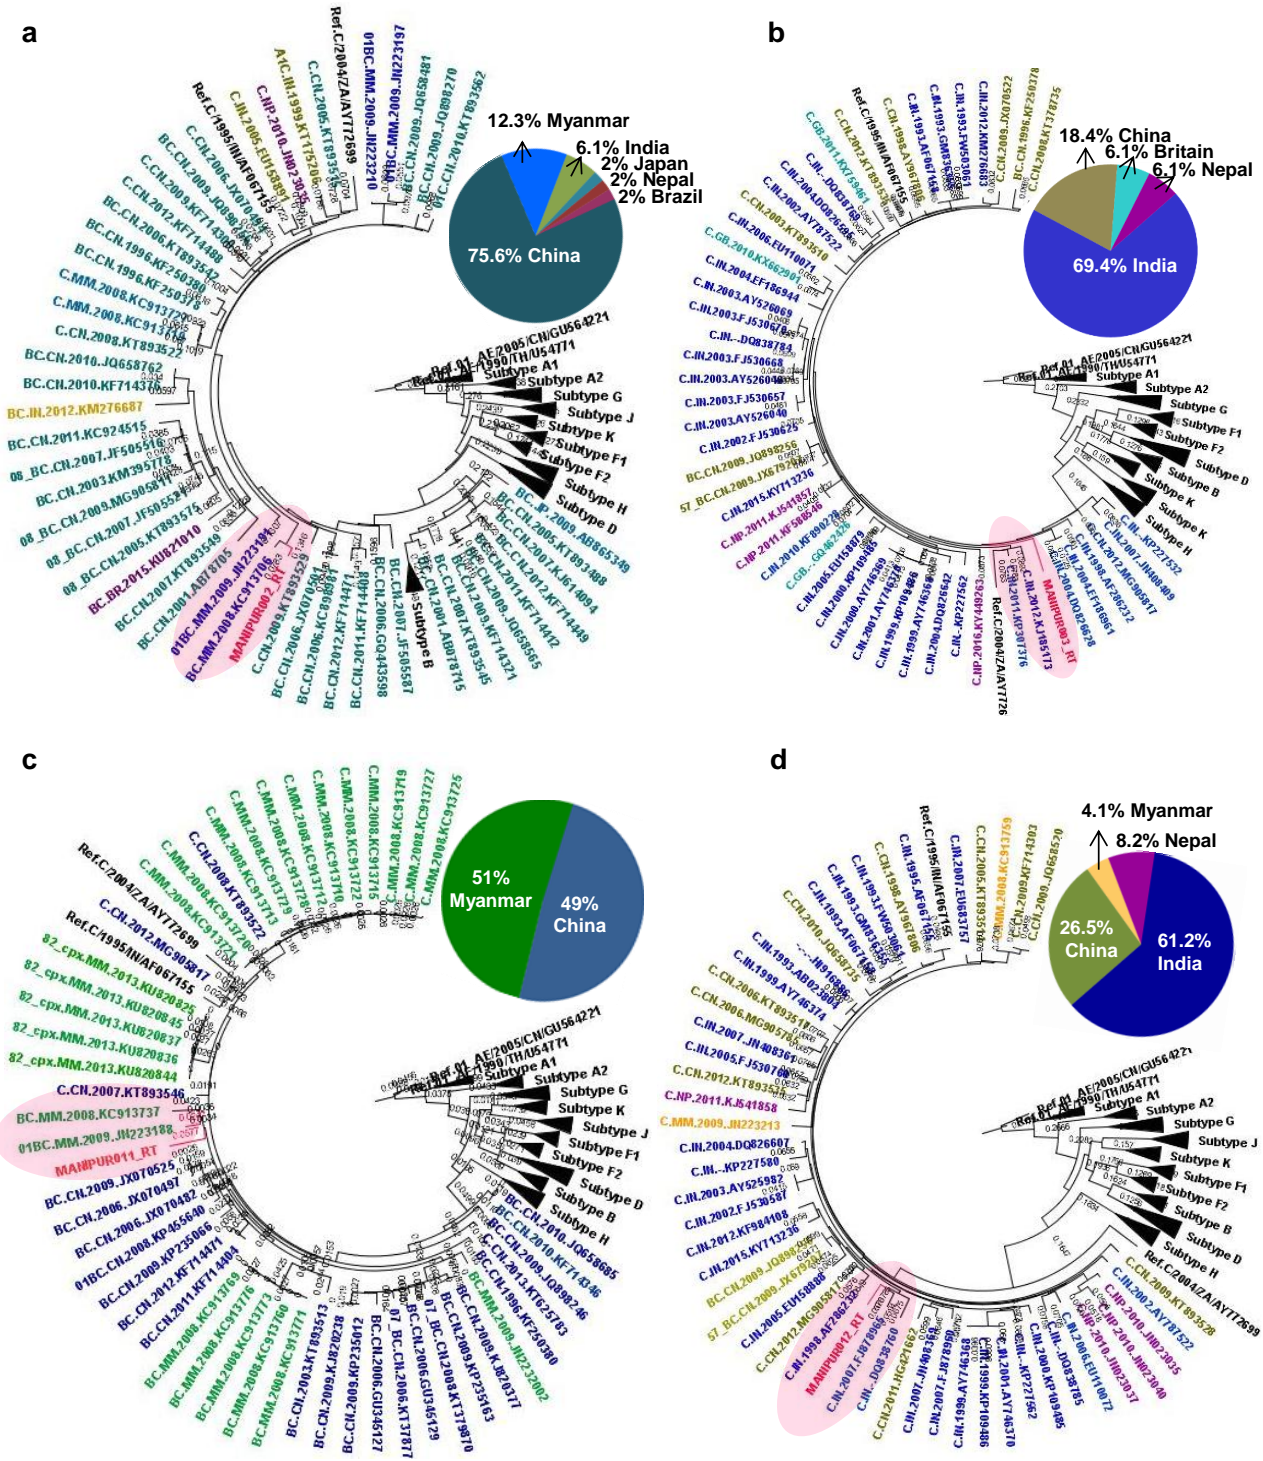

**Figure S3.** ML phylogenetic tree analysis from 4 representative HIV-1 sequence without drug resistance mutation (2 BC samples and 2 subtype C samples) with highly similar (nucleotide similarity > 94%) sequences from other countries. Manipur002\_RT (a), Manipur003\_RT (b), sample Manipur011\_RT (c), and Manipur012\_RT (d). Manipur sequences are shown in highlighted red color. The tree was rooted using reference subtype sequences. The numbers along branches correspond to aLRT values. Bar is in nucleotide substitutions per site. The pie chart shows the proportion of countries represented by the Blastn analysis. Countries correspond with defined colors which are specified in each pie chart.
